# Supplementary material for: Factors Associated with Non-Adherence to Tuberculosis Preventive Treatment among Adult Contacts of Pulmonary Tuberculosis Cases with Latent Tuberculosis Infection in Catalonia, Spain, in 2019−2021
Source: MDPI journal article supplement (doi:10.3390/tropicalmed9030054), 2024-02-27
Supplement: s1 [file s1]

## Supplementary material

**Table S1.** Bivariate correlation among study variables. The correlation among study variables was assessed using the Spearman's rank correlation coefficient ( $\rho$ ). Binary dummy variables were developed for the following variables: TB preventive treatment regimen (short-term regimen vs. long-term/undefined regimen); exposure time (<6 hours per week/sporadic vs.  $\geq 6$  hours per week); exposure to high-risk alcohol consumption (yes vs. no); smoking habit (yes vs. no); exposure type (workplace/school vs. cohabiting household/recreational); age ( $\geq 30$  years vs. <30 years); immigration (yes vs. no); index case without laboratory TB confirmation (yes vs. no); gender (male vs. female).

| Variable                                      |         | Non-adherence to TB preventive treatment | Gender | Exposure duration | Exposure type | High-risk alcohol consumption | Smoking habit | Immigration | Index case without laboratory TB confirmation | Age    |
|-----------------------------------------------|---------|------------------------------------------|--------|-------------------|---------------|-------------------------------|---------------|-------------|-----------------------------------------------|--------|
| Gender                                        | $\rho$  | 0.066                                    |        |                   |               |                               |               |             |                                               |        |
|                                               | p value | 0.039                                    |        |                   |               |                               |               |             |                                               |        |
|                                               | n       | 984                                      |        |                   |               |                               |               |             |                                               |        |
| Exposure duration                             | $\rho$  | 0.108                                    | -0.007 |                   |               |                               |               |             |                                               |        |
|                                               | p value | 0.001                                    | 0.825  |                   |               |                               |               |             |                                               |        |
|                                               | n       | 964                                      | 964    |                   |               |                               |               |             |                                               |        |
| Exposure type                                 | $\rho$  | 0.202                                    | 0.052  | 0.263             |               |                               |               |             |                                               |        |
|                                               | p value | <0.001                                   | 0.101  | <0.001            |               |                               |               |             |                                               |        |
|                                               | n       | 980                                      | 980    | 964               |               |                               |               |             |                                               |        |
| High-risk alcohol consumption                 | $\rho$  | 0.084                                    | -0.162 | 0.081             | 0.097         |                               |               |             |                                               |        |
|                                               | p value | 0.024                                    | <0.001 | 0.030             | 0.009         |                               |               |             |                                               |        |
|                                               | nn      | 728                                      | 728    | 723               | 728           |                               |               |             |                                               |        |
| Smoking habit                                 | $\rho$  | 0.084                                    | -0.012 | 0.047             | 0.178         | 0.202                         |               |             |                                               |        |
|                                               | p value | 0.023                                    | 0.749  | 0.208             | 0.000         | <0.001                        |               |             |                                               |        |
|                                               | n       | 735                                      | 735    | 729               | 735           | 728                           |               |             |                                               |        |
| Immigration                                   | $\rho$  | 0.074                                    | 0.161  | -0.076            | -0.082        | -0.021                        | -0.359        |             |                                               |        |
|                                               | p value | 0.020                                    | <0.001 | 0.018             | 0.010         | 0.564                         | <0.001        |             |                                               |        |
|                                               | n       | 984                                      | 984    | 964               | 980           | 728                           | 735           |             |                                               |        |
| Index case without laboratory TB confirmation | $\rho$  | 0.109                                    | 0.080  | -0.044            | 0.025         | 0.093                         | -0.125        | 0.170       |                                               |        |
|                                               | p value | 0.001                                    | 0.014  | 0.176             | 0.441         | 0.013                         | <0.001        | <0.001      |                                               |        |
|                                               | n       | 953                                      | 953    | 933               | 949           | 702                           | 709           | 953         |                                               |        |
| Age                                           | $\rho$  | 0.036                                    | 0.043  | 0.047             | 0.020         | 0.054                         | -0.023        | -0.004      | 0.023                                         |        |
|                                               | p value | 0.263                                    | 0.173  | 0.141             | 0.536         | 0.146                         | 0.530         | 0.910       | 0.487                                         |        |
|                                               | n       | 984                                      | 984    | 964               | 980           | 728                           | 735           | 984         | 953                                           |        |
| TB preventive treatment regimen               | $\rho$  | -0.168                                   | 0.061  | -0.050            | -0.075        | -0.151                        | -0.353        | 0.136       | 0.034                                         | -0.048 |
|                                               | p value | <0.001                                   | 0.059  | 0.126             | 0.021         | <0.001                        | <0.001        | <0.001      | 0.303                                         | 0.136  |
|                                               | n       | 984                                      | 952    | 932               | 948           | 714                           | 952           | 952         | 922                                           | 952    |
